# Supplementary material
Source: publisher figshare collection journal article supplement (https://sage.figshare.com/ndownloader/files/15631382)
Supplement: Supplementary file 1 [file 15631382]

The kinetics and mechanism of formation of the complex  $[\text{Ru}(\text{CN})_5\text{INH}]^{3-}$  through the ligand substitution reaction between Aquapentacyanoruthenate(II) anion and Isoniazid

Rupal Yadav and Radhey Mohan Naik\*

Department of Chemistry, University of Lucknow, Lucknow, (U.P.) – 226007, India

E-mail – [radheynaik@gmail.com](mailto:radheynaik@gmail.com) , E-mail – [rupal.yadav008@gmail.com](mailto:rupal.yadav008@gmail.com)

## FIGURE CAPTION

**Figure S1** Experimental IR spectrum of Ruthenium complex in  $\text{D}_2\text{O}$  solvent.

**Figure S2** Experimental  $^1\text{H}$  NMR spectrum of Ruthenium complex in  $\text{D}_2\text{O}$  solvent.

**Figure S3** Experimental mass spectrum of the complex.

**Scheme S1** Synthesis of pentacyanopyridine-4-carbohydrazidoruthenate(II) ion ( $[\text{Ru}(\text{CN})_5\text{INH}]^{3-}$ ) complex.

## TABLE CAPTION

**Table S1**  $^1\text{H}$  NMR chemical shifts values ( $\delta$  / ppm) in  $\text{D}_2\text{O}$  – solvent at  $25^\circ\text{C}$  and their respective assignments for  $[\text{Ru}(\text{CN})_5\text{INH}]^{3-}$  complex.

**Table S2** Effect of  $[\text{Ru}(\text{CN})_5\text{H}_2\text{O}^{3-}]$  under conditions  $[\text{INH}] = 4 \times 10^{-3} \text{ M}$ ,  $\text{pH} = 4.0 \pm 0.02$ , Ionic Strength =  $0.2 \text{ M}$  ( $\text{NaClO}_4$ ) and Temperature =  $25.0 \pm 0.01^\circ\text{C}$ .

# FIGURE CAPTION

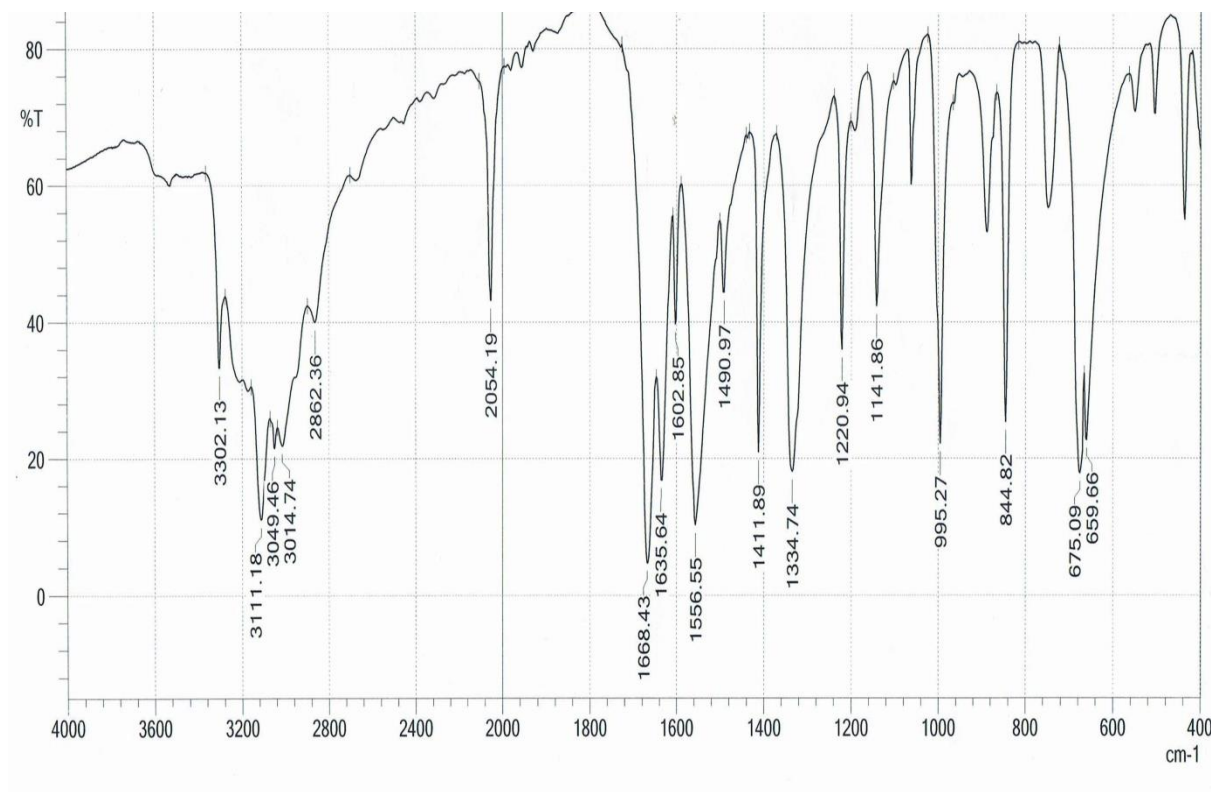

**Figure S1** Experimental IR spectrum of Ruthenium complex in D<sub>2</sub>O solvent.

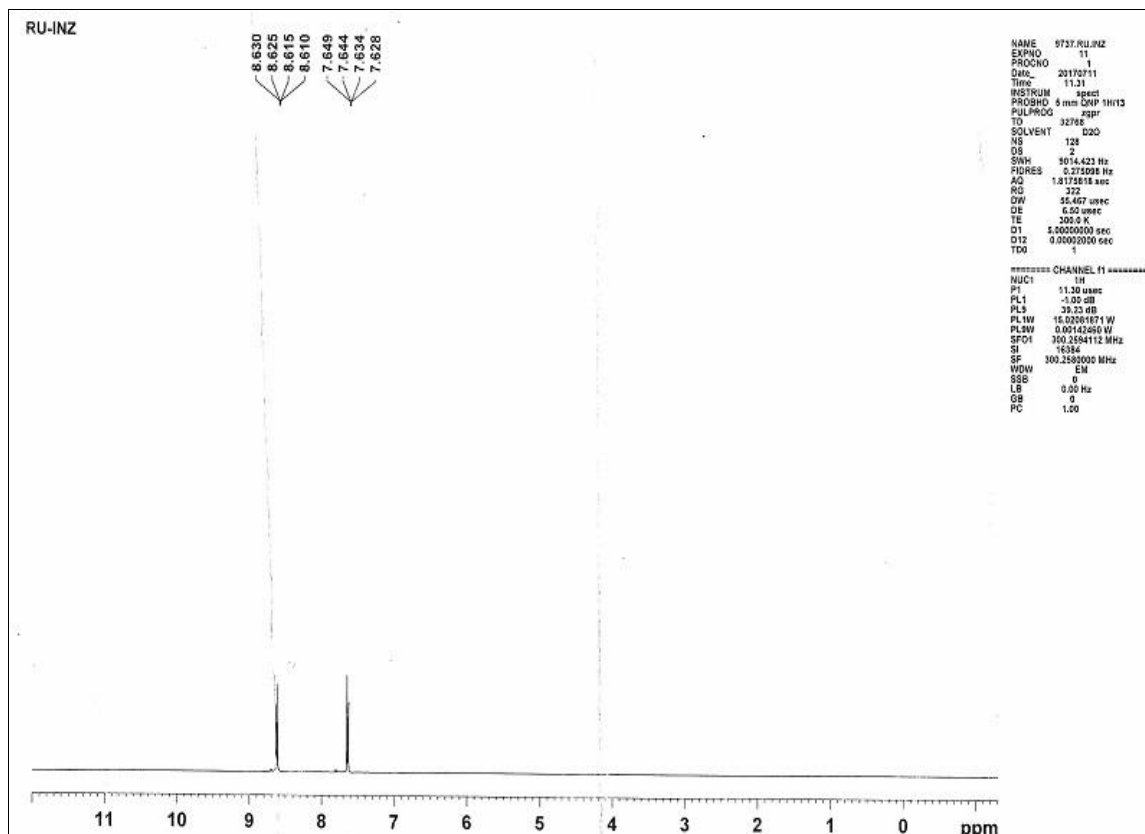

**Figure S2** Experimental  $^1\text{H}$  NMR spectrum of Ruthenium complex in  $\text{D}_2\text{O}$  solvent.

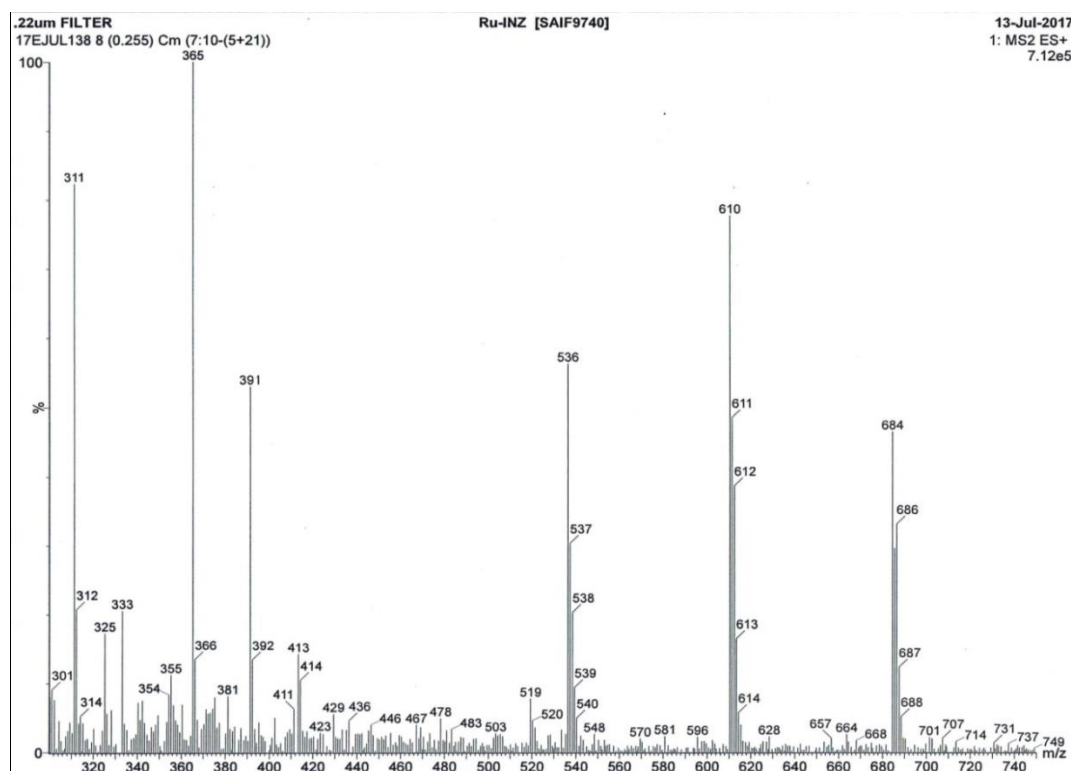

**Figure S3** Experimental mass spectrum of the complex.

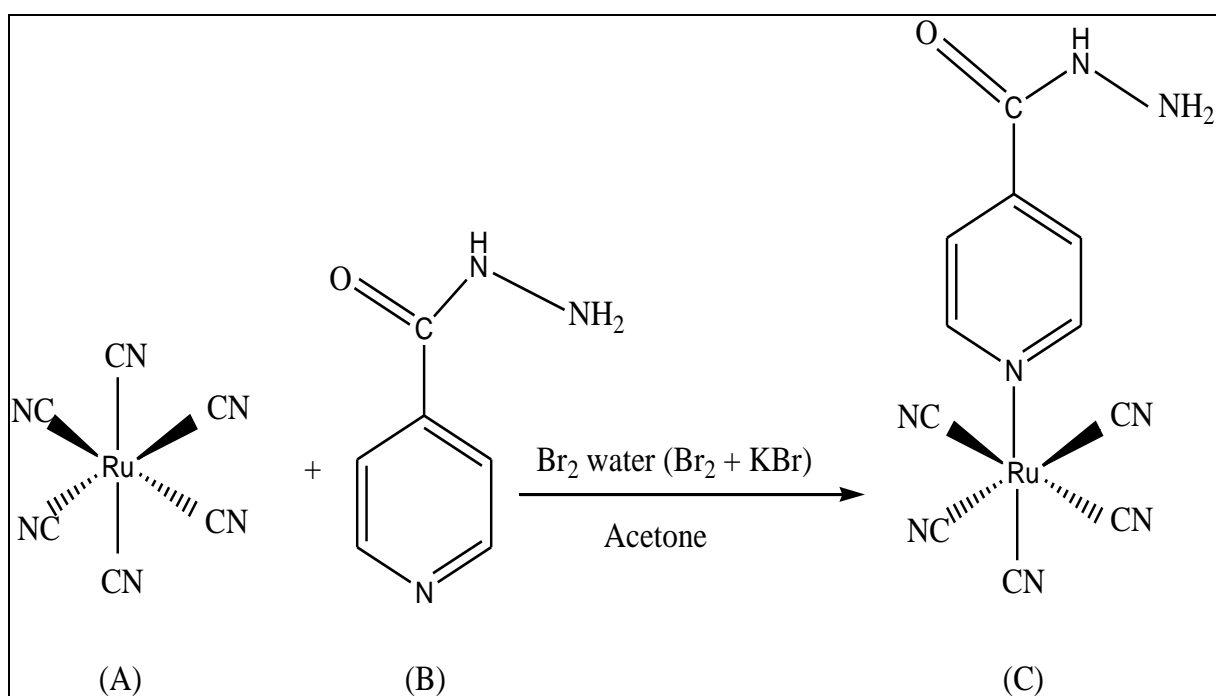

**Scheme S1** Synthesis of pentacyanopyridine-4-carbohydrazidoruthenate(II) ion ( $[\text{Ru}(\text{CN})_5\text{INH}]^{3-}$ ) complex.

# TABLE CAPTION

**Table S1**  $^1\text{H}$  NMR chemical shifts values ( $\delta$  / ppm) in  $\text{D}_2\text{O}$  – solvent at  $25^\circ\text{C}$  and their respective assignments for  $[\text{Ru}(\text{CN})_5\text{INH}]^{3-}$  complex

| Chemical Shifts<br>( $\delta$ / ppm) | Assignment                                                                                                   |
|--------------------------------------|--------------------------------------------------------------------------------------------------------------|
| 8.620                                | Benzene ring protons nearer to heterocyclic nitrogen atom                                                    |
| 7.639                                | Benzene ring protons                                                                                         |
|                                      | NH and $\text{NH}_2$ protons, being $\text{D}_2\text{O}$ exchangeable protons, do not appear in the spectrum |

**Table S2** Effect of  $[\text{Ru}(\text{CN})_5\text{H}_2\text{O}^{3-}]$  under conditions  $[\text{INH}] = 4 \times 10^{-3} \text{ M}$ ,  $\text{pH} = 4.0 \pm 0.02$ , Ionic Strength =  $0.2 \text{ M}$  ( $\text{NaClO}_4$ ) and Temperature =  $25.0 \pm 0.01^\circ\text{C}$ .

| $[\text{Ru}(\text{CN})_5\text{H}_2\text{O}^{3-}] \times 10^4, \text{ M}$ | $k_{obs} \times 10^4, \text{ S}^{-1}$ |
|--------------------------------------------------------------------------|---------------------------------------|
| 4                                                                        | 0.38                                  |
| 3.5                                                                      | 0.2                                   |
| 3                                                                        | 0.38                                  |
| 2.5                                                                      | 0.29                                  |
| 2                                                                        | 1.11                                  |
